CORRECTION

# Correction: The Aerodynamic Cost of Head Morphology in Bats: Maybe Not as Bad as It Seems

Dieter Vanderelst, Herbert Peremans, Norizham Abdul Razak, Edouard Verstraelen, Grigorios Dimitriadis

The fifth author's name is spelled incorrectly. The correct name is: Grigorios Dimitriadis.

Additionally, there are errors in the author affiliations. The affiliations should appear as shown here:

Dieter Vanderelst<sup>1,2</sup>, Herbert Peremans<sup>2</sup>, Norizham Abdul Razak<sup>3</sup>, Edouard Verstraelen<sup>4</sup>, Greg Dimitriadis<sup>4</sup>

1 School of Biological Sciences, Bristol University, Bristol, UK, 2 Department of Engineering Management, Active Perception Lab, University of Antwerp, Antwerp, Belgium, 3 School of Aerospace Engineering, Engineering Campus, Universiti Sains Malaysia, 14300 Nibong Tebal, Seberang Perai Selatan, Pulau Pinang, Malaysia, 4 Aerospace and Mechanical Engineering Department, University of Liège, Liège, Belgium.

## Reference

1. Vanderelst D, Peremans H, Razak NA, Verstraelen E, Dimitriadis G (2015) The Aerodynamic Cost of Head Morphology in Bats: Maybe Not as Bad as It Seems. PLoS ONE 10(3): e0118545. doi: [10.1371/journal.pone.0118545](https://doi.org/10.1371/journal.pone.0118545) PMID: [25739038](https://pubmed.ncbi.nlm.nih.gov/25739038/)

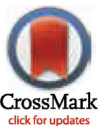

## OPEN ACCESS

**Citation:** Vanderelst D, Peremans H, Razak NA, Verstraelen E, Dimitriadis G (2015) Correction: The Aerodynamic Cost of Head Morphology in Bats: Maybe Not as Bad as It Seems. PLoS ONE 10(5): e0126061. doi:10.1371/journal.pone.0126061

**Published:** May 12, 2015

**Copyright:** © 2015 Vanderelst et al. This is an open access article distributed under the terms of the [Creative Commons Attribution License](https://creativecommons.org/licenses/by/4.0/), which permits unrestricted use, distribution, and reproduction in any medium, provided the original author and source are credited.
